# Supplementary material
Source: Springer Nature journal article supplement (https://www.springermedizin.de/resource/supplementary/12885_2008_1105_MOESM1_ESM.pdf/9471128)

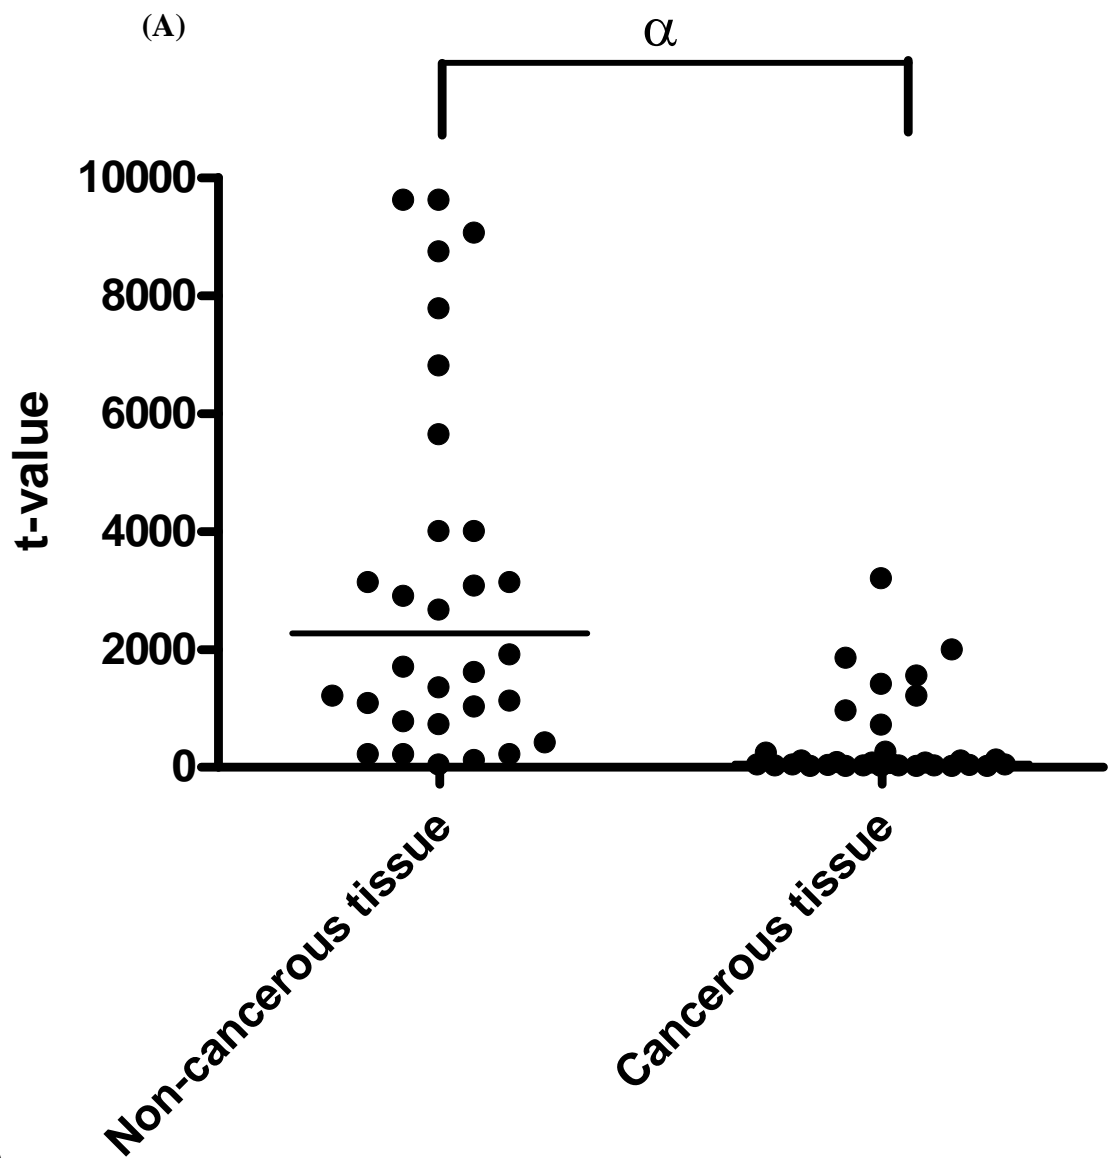

(B)

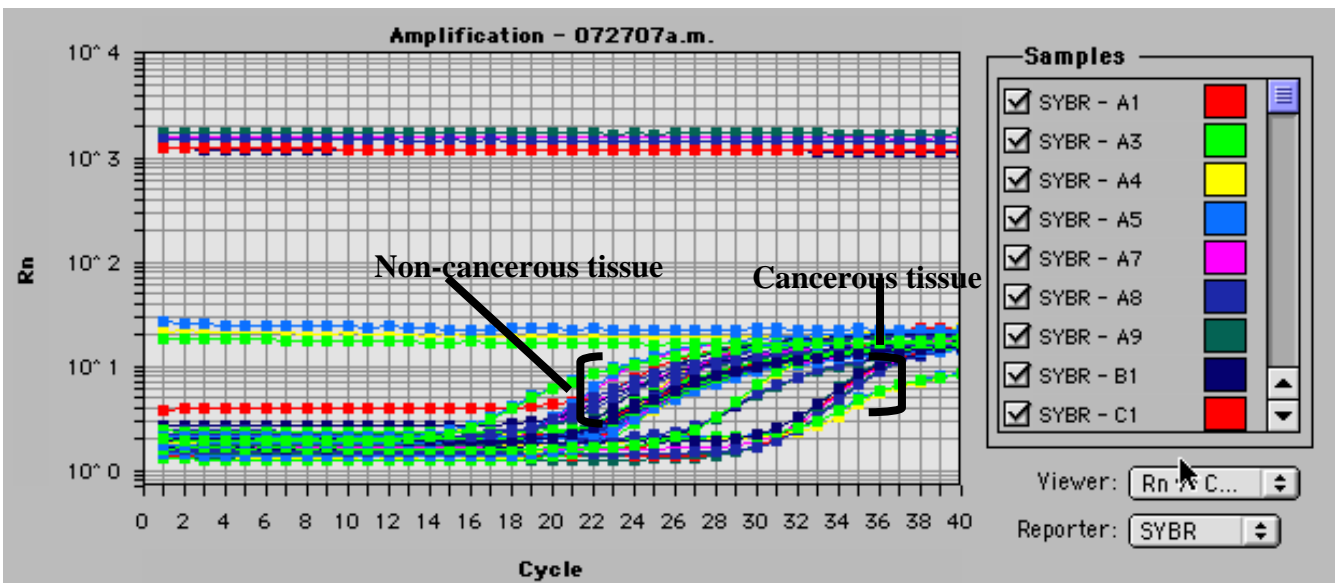

Supplement: MOESM1 [file 9471128]
